# Supplementary material for: Fe,Ni-Based Metal–Organic Frameworks Embedded in Nanoporous Nitrogen-Doped Graphene as a Highly Efficient Electrocatalyst for the Oxygen Evolution Reaction
Source: MDPI journal article supplement (doi:10.3390/nano14090751), 2024-04-25
Supplement: s1 [file s1]

# Supplementary Information

## Fe,Ni-Based Metal–Organic Frameworks Embedded in Nanoporous Nitrogen-Doped Graphene as a Highly Efficient Electrocatalyst for the Oxygen Evolution Reaction

Panjuan Tang <sup>1,†</sup>, Biagio Di Vizio <sup>1,†</sup>, Jijin Yang <sup>1</sup>, Bhushan Patil <sup>1</sup>, Mattia Cattelan <sup>1,2,3,\*</sup> and Stefano Agnoli <sup>1,2,3,\*</sup>

<sup>1</sup> Department of Chemical Sciences, University of Padova, Via F. Marzolo 1, 35131 Padova, Italy; panjuan.tang@phd.unipd.it (P.T.)

<sup>2</sup> National Interuniversity Consortium of Materials Science and Technology (INSTM), 50121 Florence, Italy

<sup>3</sup> Consorzio Interuniversitario Reattività Chimica e Catalisi (CIRCC) Research Unit, University of Padova, 35131 Padova, Italy

\* Correspondence: mattia.cattelan@unipd.it (M.C.); stefano.agnoli@unipd.it (S.A.); Tel.: +39-0498275845 (M.C.); +39-0498275167 (S.A.)

† These authors have equally contributed to this work.

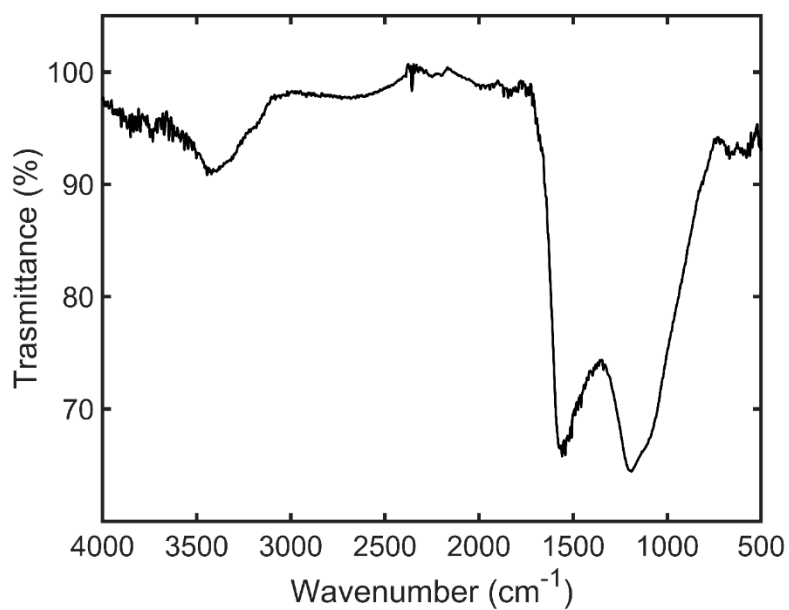

Figure S1: NG Fourier Transformed Infrared (FT-IR), prepared on KBr disk. Spectrum recorded with a Nicolet Nexus FT-IR spectrometer. The characteristic NG bands of C-N ( $\sim 1160\text{ cm}^{-1}$ ) and C=C ( $\sim 1550\text{ cm}^{-1}$ ) vibrations are visible.

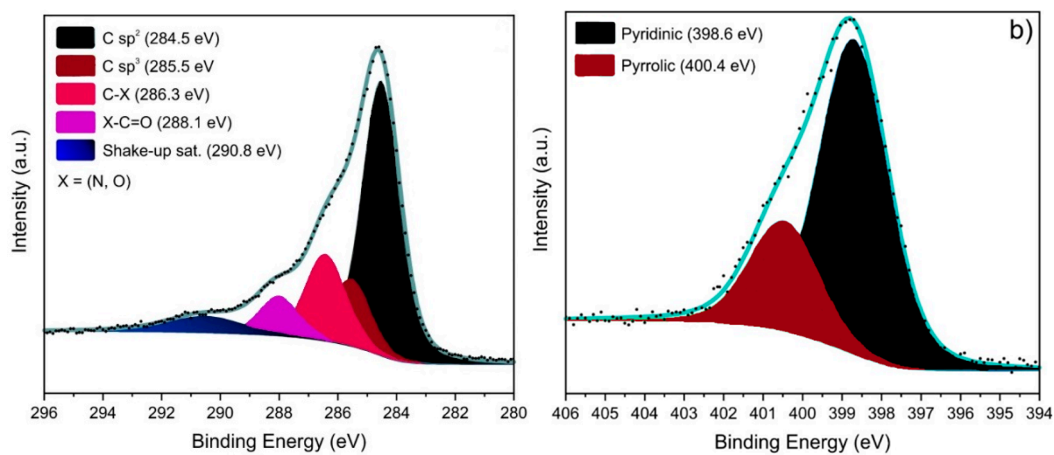

Figure S2: NG not-monochromatic X-ray photoemission spectroscopy (XPS) lines of C1s and N1s, deconvoluted into single chemically shifted components.

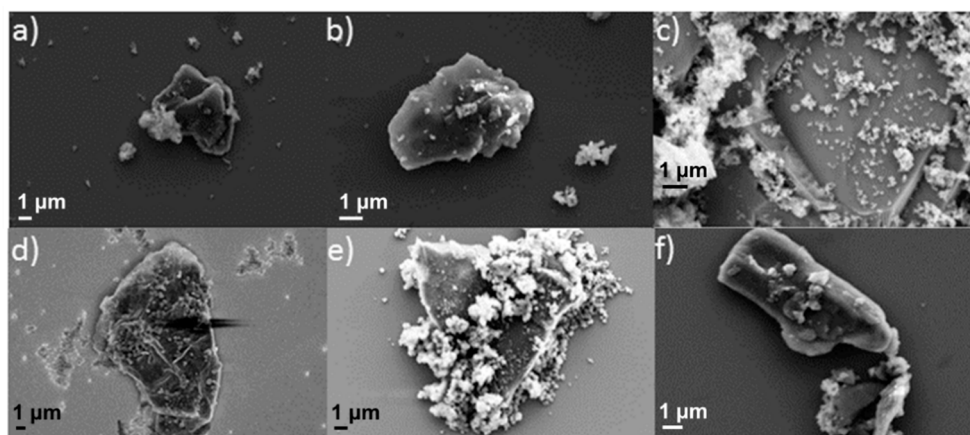

Figure S3. SEM images of as-prepared a) MIL-NG-1, b) MIL-NG-2, c) MIL-NG-3, d) MIL-NG-4, e) MIL-NG-5, f) MIL-NG-6.

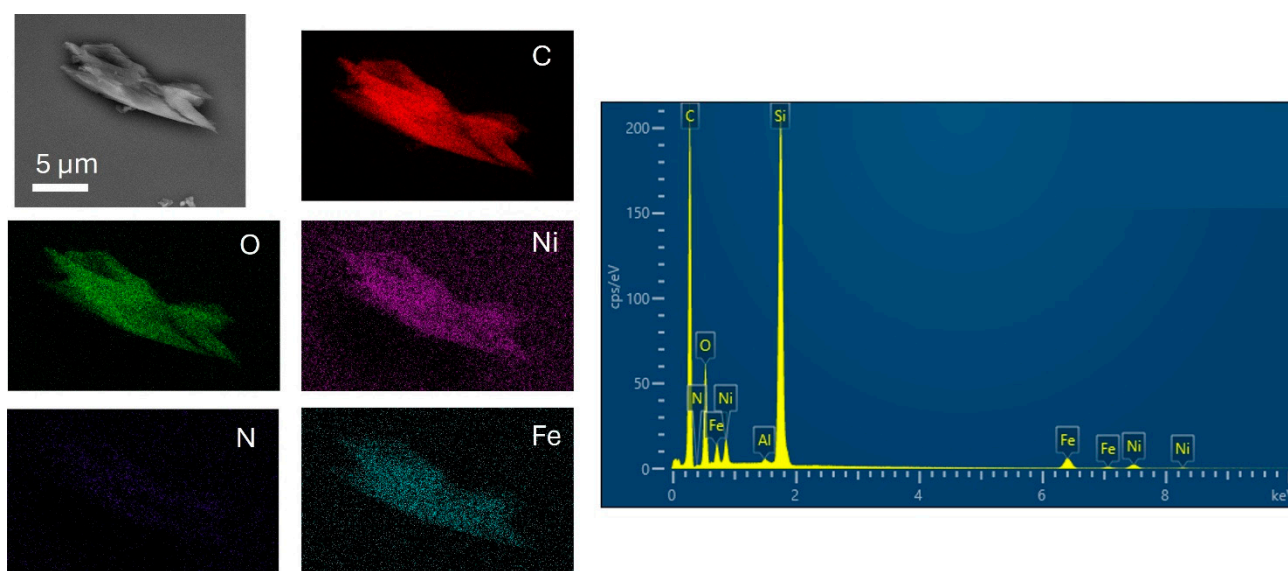

Figure S4. SEM EDX mapping of MIL-NG-3 and EDX spectrum.

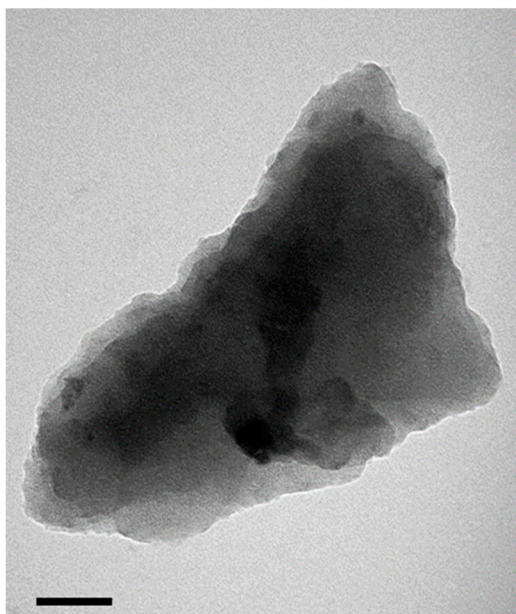

Figure S5: TEM image of NG, scale bar 100 nm.

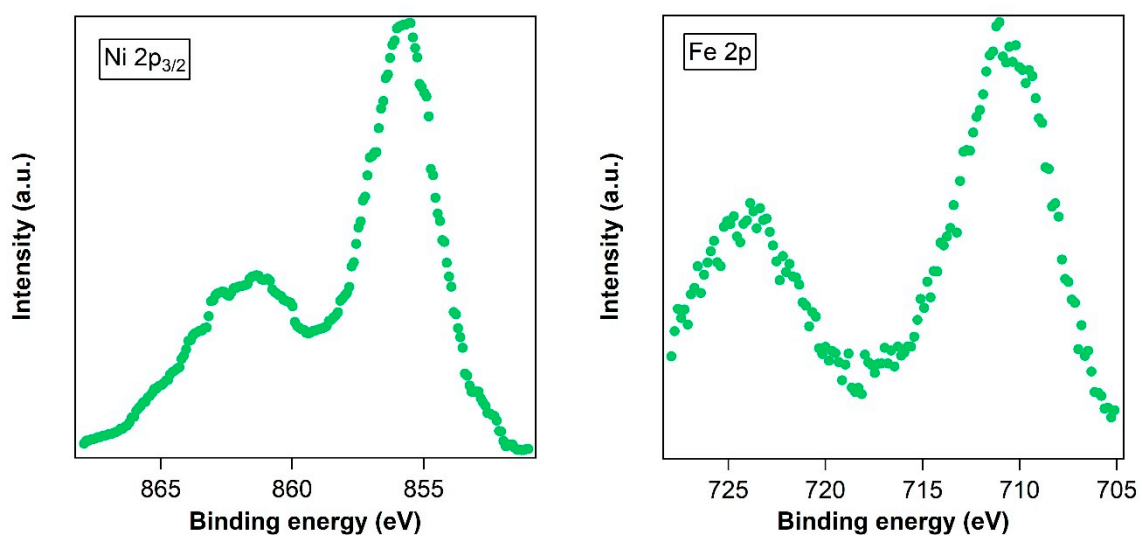

Figure S6: Ni 2p<sub>3/2</sub> and Fe 2p XPS lines of MIL-NG-3 after chronoamperometry in OER indicating the presence of Ni(OH)<sub>2</sub>/NiOOH and FeOOH.
